# Supplementary material
Source: PubMed Central journal article supplement (PMC4492386)
Supplement: 10.1534_114.173443_genetics.114.173443-4.pdf [file 10.1534_114.173443_genetics.114.173443-4.pdf]

**Table S6**      **Connectivity similarity matrix**

| Trait | arsp  | cs    | iar   | ips   | lf    | lu    | ps    | sar   | spcd  | sts   |
|-------|-------|-------|-------|-------|-------|-------|-------|-------|-------|-------|
| arsp  | 1.000 | 0.308 | 0.865 | 0.692 | 0.615 | 0.385 | 0.808 | 0.731 | 0.538 | 0.596 |
| cs    | 0.308 | 1.000 | 0.538 | 0.750 | 0.500 | 0.500 | 0.308 | 0.000 | 0.808 | 0.500 |
| iar   | 0.865 | 0.538 | 1.000 | 0.769 | 0.769 | 0.615 | 0.577 | 0.654 | 0.404 | 0.692 |
| ips   | 0.692 | 0.750 | 0.769 | 1.000 | 0.500 | 0.500 | 0.308 | 0.538 | 0.192 | 0.500 |
| lf    | 0.615 | 0.500 | 0.769 | 0.500 | 1.000 | 0.500 | 0.308 | 0.462 | 0.692 | 0.750 |
| lu    | 0.385 | 0.500 | 0.615 | 0.500 | 0.500 | 1.000 | 0.385 | 0.000 | 0.000 | 0.500 |
| ps    | 0.808 | 0.308 | 0.577 | 0.308 | 0.308 | 0.385 | 1.000 | 0.769 | 0.192 | 0.250 |
| sar   | 0.731 | 0.000 | 0.654 | 0.538 | 0.462 | 0.000 | 0.769 | 1.000 | 0.365 | 0.442 |
| spcd  | 0.538 | 0.808 | 0.404 | 0.192 | 0.692 | 0.000 | 0.192 | 0.365 | 1.000 | 0.212 |
| sts   | 0.596 | 0.500 | 0.692 | 0.750 | 0.750 | 0.500 | 0.250 | 0.442 | 0.212 | 1.000 |

Created from data in Markov *et al.* (2012).
