# Supplementary material
Source: PubMed Central journal article supplement (PMC4492386)
Supplement: 10.1534_114.173443_genetics.114.173443-5.pdf [file 10.1534_114.173443_genetics.114.173443-5.pdf]

**Table S4** Phenotypic correlation matrix for sulcal lengths

| Trait | arsp   | cs    | iar    | ips    | lf     | lu    | ps     | sar    | spcd   | sts    |
|-------|--------|-------|--------|--------|--------|-------|--------|--------|--------|--------|
| arsp  | 1.000  | 0.144 | 0.049  | 0.109  | 0.115  | 0.099 | -0.032 | -0.099 | 0.146  | -0.031 |
| cs    | 0.144  | 1.000 | 0.122  | 0.278  | 0.232  | 0.317 | 0.206  | 0.109  | 0.086  | 0.138  |
| iar   | 0.049  | 0.122 | 1.000  | -0.351 | -0.014 | 0.385 | 0.468  | 0.511  | 0.026  | -0.328 |
| ips   | 0.109  | 0.278 | -0.351 | 1.000  | 0.491  | 0.181 | 0.009  | -0.336 | 0.354  | 0.487  |
| lf    | 0.115  | 0.232 | -0.014 | 0.491  | 1.000  | 0.216 | 0.076  | -0.098 | 0.282  | 0.604  |
| lu    | 0.099  | 0.317 | 0.385  | 0.181  | 0.216  | 1.000 | 0.275  | 0.223  | 0.160  | 0.048  |
| ps    | -0.032 | 0.206 | 0.468  | 0.009  | 0.076  | 0.275 | 1.000  | 0.187  | 0.108  | 0.119  |
| sar   | -0.099 | 0.109 | 0.511  | -0.336 | -0.098 | 0.223 | 0.187  | 1.000  | -0.058 | -0.398 |
| spcd  | 0.146  | 0.086 | 0.026  | 0.354  | 0.282  | 0.160 | 0.108  | -0.058 | 1.000  | 0.242  |
| sts   | -0.031 | 0.138 | -0.328 | 0.487  | 0.604  | 0.048 | 0.119  | -0.398 | 0.242  | 1.000  |

Averaged across both hemispheres and based on baboon endocast metric trait measurements.
