# Supplementary material
Source: PubMed Central journal article supplement (PMC4492386)
Supplement: 10.1534_114.173443_genetics.114.173443-8.pdf [file 10.1534_114.173443_genetics.114.173443-8.pdf]

**Table S3 Genetic correlation matrix for sulcal lengths**

| Trait | arsp   | Cs     | iar    | ips    | lf     | lu     | ps     | sar    | spcd   | sts    |
|-------|--------|--------|--------|--------|--------|--------|--------|--------|--------|--------|
| arsp  | 1.000  | 0.241  | -1.000 | 0.113  | -0.185 | -0.287 | -0.372 | -0.507 | 0.328  | -0.223 |
| cs    | 0.241  | 1.000  | -0.284 | 0.240  | -0.272 | 0.432  | 0.185  | -0.188 | -0.322 | -0.613 |
| iar   | -1.000 | -0.284 | 1.000  | -0.329 | 0.264  | 0.470  | 0.509  | -0.251 | 1.000  | -0.605 |
| ips   | 0.113  | 0.240  | -0.329 | 1.000  | 0.741  | 0.275  | 0.399  | 1.000  | 0.793  | 0.577  |
| lf    | -0.185 | -0.272 | 0.264  | 0.741  | 1.000  | 0.443  | 0.255  | -0.245 | 1.000  | 0.836  |
| lu    | -0.287 | 0.432  | 0.470  | 0.275  | 0.443  | 1.000  | 0.555  | -0.719 | 0.083  | 1.000  |
| ps    | -0.372 | 0.185  | 0.509  | 0.399  | 0.255  | 0.555  | 1.000  | 0.118  | 0.571  | 0.267  |
| sar   | -0.507 | -0.188 | -0.251 | 1.000  | -0.245 | -0.719 | 0.118  | 1.000  | -1.000 | -0.337 |
| spcd  | 0.328  | -0.322 | 1.000  | 0.793  | 1.000  | 0.083  | 0.571  | -1.000 | 1.000  | 1.000  |
| sts   | -0.223 | -0.613 | -0.605 | 0.577  | 0.836  | 1.000  | 0.267  | -0.337 | 1.000  | 1.000  |

Averaged across both hemispheres, created from the extended baboon pedigree.
